# Supplementary material for: Iron depletion in the intestines ofMalvoliomutant flies does not occur in the absence of a multicopper oxidase
Source: Oxford University Press journal article supplement (doi:10.1242/jeb.051664), 2011-02-23
Supplement: jeb051664tables1.pdf [file jeb051664tables1.pdf]

Table S1. Summary of all metal measurements conducted in this study

|                |           | [Fe] mg/g |                    | [Cu] mg/g |                    | [Mn] mg/g |                    | [Zn] mg/g |       |       |
|----------------|-----------|-----------|--------------------|-----------|--------------------|-----------|--------------------|-----------|-------|-------|
| DIET           | GENOTYPE  | N         | VALUE              | STDEV     | VALUE              | STDEV     | VALUE              | STDEV     | VALUE | STDEV |
| Normal         | white     | 16        | 0.203              | 0.044     | 0.014              | 0.005     | 0.027              | 0.019     | 0.066 | 0.012 |
|                | Mvl       | 17        | 0.170              | 0.044     | 0.014              | 0.004     | 0.028              | 0.019     | 0.070 | 0.021 |
|                | MCO3      | 9         | 0.214              | 0.033     | 0.019              | 0.007     | 0.016              | 0.005     | 0.059 | 0.011 |
|                | MCO3, Mvl | 9         | 0.197              | 0.048     | 0.014              | 0.005     | 0.016              | 0.007     | 0.062 | 0.010 |
| 1mM Fe         | white     | 14        | 0.325              | 0.095     | 0.014              | 0.004     | 0.037              | 0.037     | 0.057 | 0.012 |
|                | Mvl       | 13        | 0.335              | 0.119     | 0.015              | 0.007     | 0.042              | 0.036     | 0.063 | 0.020 |
|                | MCO3      | 6         | 0.346              | 0.055     | 0.016              | 0.006     | 0.016              | 0.007     | 0.055 | 0.015 |
|                | MCO3, Mvl | 6         | 0.318              | 0.037     | 0.013              | 0.005     | 0.015              | 0.006     | 0.057 | 0.012 |
| 1mM Cu         | white     | 13        | 0.144              | 0.029     | 0.194              | 0.048     | 0.030              | 0.013     | 0.055 | 0.014 |
|                | Mvl       | 13        | 0.092 <sup>a</sup> | 0.023     | 0.183              | 0.036     | 0.029              | 0.008     | 0.050 | 0.012 |
|                | MCO3      | 6         | 0.132              | 0.027     | 0.127 <sup>b</sup> | 0.021     | 0.021              | 0.009     | 0.054 | 0.014 |
|                | MCO3, Mvl | 6         | 0.120              | 0.047     | 0.118 <sup>b</sup> | 0.017     | 0.027              | 0.012     | 0.056 | 0.010 |
| 1mM Mn         | white     | 8         | 0.209              | 0.043     | 0.015              | 0.002     | 0.128              | 0.043     | 0.065 | 0.015 |
|                | Mvl       | 7         | 0.152              | 0.049     | 0.015              | 0.005     | 0.133              | 0.049     | 0.068 | 0.021 |
|                | MCO3      | 3         | 0.214              | 0.075     | 0.020              | 0.002     | 0.153              | 0.042     | 0.056 | 0.000 |
|                | MCO3, Mvl | 3         | 0.150              | 0.013     | 0.017              | 0.000     | 0.133              | 0.023     | 0.052 | 0.001 |
| 1mM Zn         | white     | 7         | 0.185              | 0.051     | 0.017              | 0.009     | 0.030              | 0.026     | 0.210 | 0.048 |
|                | Mvl       | 7         | 0.146 <sup>a</sup> | 0.026     | 0.014              | 0.002     | 0.029              | 0.020     | 0.197 | 0.019 |
|                | MCO3      | 3         | 0.220              | 0.011     | 0.018              | 0.001     | 0.016              | 0.006     | 0.172 | 0.037 |
|                | MCO3, Mvl | 3         | 0.189              | 0.021     | 0.016              | 0.001     | 0.012              | 0.001     | 0.186 | 0.042 |
| 1mM Fe+Cu      | white     | 6         | 0.262              | 0.031     | 0.157              | 0.038     | 0.024              | 0.010     | 0.044 | 0.016 |
|                | Mvl       | 6         | 0.282              | 0.062     | 0.162              | 0.018     | 0.031              | 0.008     | 0.048 | 0.013 |
|                | MCO3      | 5         | 0.289              | 0.069     | 0.118 <sup>b</sup> | 0.036     | 0.018              | 0.007     | 0.059 | 0.034 |
|                | MCO3, Mvl | 5         | 0.229              | 0.038     | 0.104 <sup>b</sup> | 0.015     | 0.024              | 0.009     | 0.054 | 0.012 |
| 1mM Fe+Zn      | white     | 9         | 0.390              | 0.101     | 0.016              | 0.005     | 0.025              | 0.016     | 0.168 | 0.064 |
|                | Mvl       | 9         | 0.289              | 0.071     | 0.016              | 0.005     | 0.022              | 0.009     | 0.177 | 0.048 |
|                | MCO3      | 5         | 0.327              | 0.067     | 0.021              | 0.009     | 0.017              | 0.007     | 0.197 | 0.108 |
|                | MCO3, Mvl | 5         | 0.349              | 0.068     | 0.015              | 0.006     | 0.016              | 0.007     | 0.161 | 0.057 |
| 1mM Mn+Zn      | white     | 3         | 0.191              | 0.011     | 0.017              | 0.003     | 0.169              | 0.031     | 0.182 | 0.028 |
|                | Mvl       | 3         | 0.134              | 0.032     | 0.016              | 0.002     | 0.156              | 0.053     | 0.160 | 0.043 |
|                | MCO3      | 3         | 0.229              | 0.060     | 0.017              | 0.001     | 0.160              | 0.031     | 0.169 | 0.038 |
|                | MCO3, Mvl | 3         | 0.152              | 0.028     | 0.018              | 0.001     | 0.124              | 0.025     | 0.139 | 0.030 |
| pooled average | white     | -         | 0.197              | 0.011     | 0.016              | 0.001     | 0.029              | 0.005     | 0.057 | 0.009 |
|                | Mvl       | -         | 0.151 <sup>c</sup> | 0.015     | 0.015              | 0.001     | 0.030              | 0.007     | 0.060 | 0.010 |
|                | MCO3      | -         | 0.219              | 0.007     | 0.019 <sup>d</sup> | 0.002     | 0.017 <sup>e</sup> | 0.002     | 0.057 | 0.002 |
|                | MCO3, Mvl | -         | 0.172              | 0.024     | 0.016              | 0.002     | 0.018 <sup>e</sup> | 0.006     | 0.056 | 0.004 |

The number of biological replicates (*N*), average values (VALUE) and standard deviations (STDEV) are indicated for each condition. One-way ANOVA was performed for each metal in all eight treatments and for the pooled data.

Superscript letters denote statistically significant results.

<sup>a</sup>In two (out of five non-iron supplemented) treatments *Mvl*<sup>P71</sup> mutants show statistically significantly lower iron concentration than *w* and *MCO3*<sup>C359</sup> flies.

<sup>b</sup>In both treatments where copper was added to the diet, *MCO3*<sup>C359</sup> and *MCO3*<sup>C359</sup>, *Mvl*<sup>P71</sup> flies accumulated less copper than *w* and *Mvl*<sup>P71</sup> mutants.

<sup>c</sup>*Mvl*<sup>P71</sup> mutants had a statistically significant reduction in iron concentration compared with *w* and *MCO3*<sup>C359</sup> flies but the value was not significantly different from that of the double mutant.

<sup>d</sup>*MCO3*<sup>C359</sup> mutants had a statistically significant higher copper concentration than *w* and *Mvl*<sup>P71</sup> flies; *Mvl*<sup>P71</sup> loss of function rescues this phenotype.

<sup>e</sup>*MCO3*<sup>C359</sup> and *MCO3*<sup>C359</sup>, *Mvl*<sup>P71</sup> flies had a statistically significant lower manganese concentration than *w* and *Mvl*<sup>P71</sup> flies.

Different coloured text indicates the key findings:

**Red:** the average concentration of iron in *Mvl*<sup>P71</sup> mutants was lower than in *w* and *MCO3*<sup>C359</sup> mutants when no iron was added to the diet. The iron concentration was the same in *Mvl*<sup>P71</sup> and *w* mutants when the diet was supplemented with iron.

**Orange:** When compared with *w* or *Mvl*<sup>P71</sup> flies, the concentration of copper in *MCO3*<sup>C359</sup> mutants was higher, provided no copper was added to the diet. *Mvl*<sup>P71</sup> loss of function rescued the aforementioned effect (i.e. *MCO3*<sup>C359</sup>, *Mvl*<sup>P71</sup> double mutants accumulated less copper than *MCO3*<sup>C359</sup> single mutants).

**Brown:** *MCO3*<sup>C359</sup> and *MCO3*<sup>C359</sup>, *Mvl*<sup>P71</sup> mutants fed on copper accumulated less total copper than *w* flies.

**Blue:** *MCO3*<sup>C359</sup> mutants had a lower manganese concentration than *w* or *Mvl*<sup>P71</sup> flies. Manganese concentration was comparable between all genotypes if the diet was supplemented with manganese.

**Green:** dietary copper reduced iron concentrations in all genotypes.

Background colours indicate that the measured metal was also supplemented in the diet.
